# Supplementary material
Source: Springer Nature journal article supplement (https://www.springermedizin.de/resource/supplementary/13075_2005_1825_MOESM6_ESM.pdf/9690664)

Figure 5

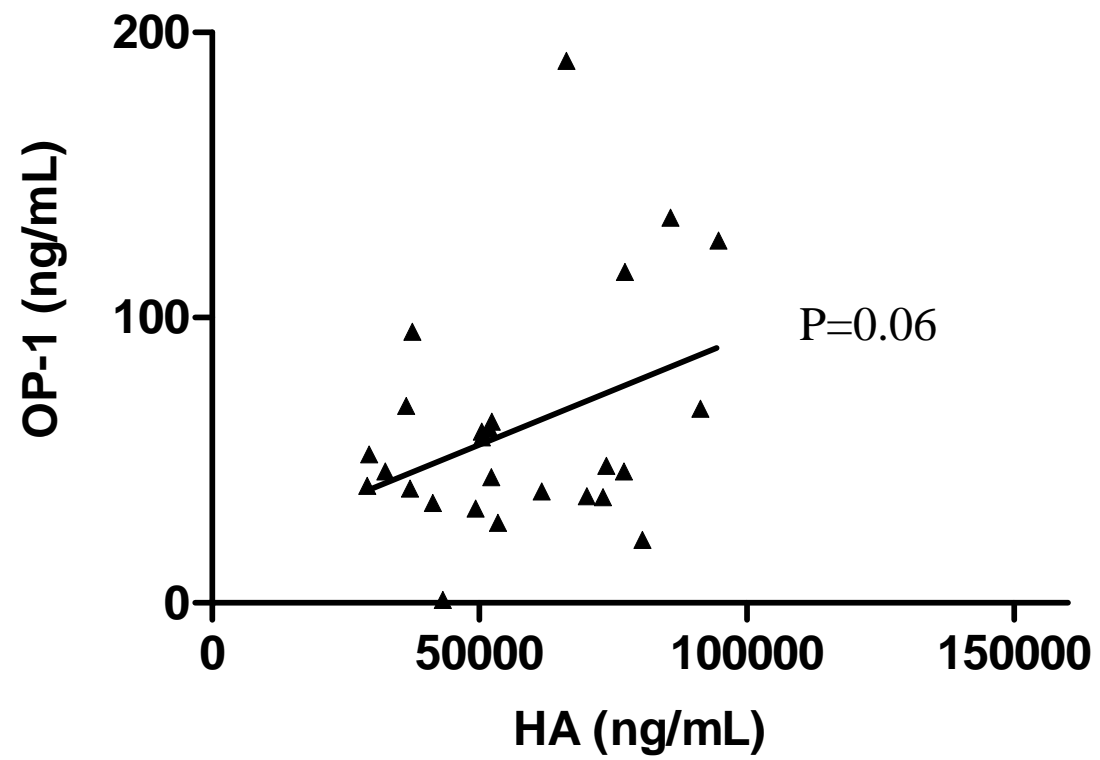

Supplement: MOESM6 [file 9690664]
